# Supplementary material for: Bone mineral density changes in the graft after acetabular impaction bone grafting in primary and revision hip surgery: A 2-year prospective follow-up
Source: PubMed Central journal article supplement (PMC6055772; doi:10.1080/17453674.2018.1460776), 2018-04-11
Supplement: IORT_A_1460776_SM9126.pdf [file IORT_A_1460776_SM9126.pdf]

## Supplementary data

Table 2. Point estimates of mean bone mineral density (g/cm<sup>2</sup>) and as percentage of baseline values (100%) with 95% confidence intervals per region of interest of the impacted bone graft at each study interval <sup>a</sup>

| Region                     | 0 months<br>n = 20 | 3 months<br>n = 20         | 6 months<br>n = 20         | 1 year<br>n = 20           | 2 years<br>n = 17          |
|----------------------------|--------------------|----------------------------|----------------------------|----------------------------|----------------------------|
| Cranial, g/cm <sup>2</sup> | 2.5 (2.1–2.8)      | 2.6 <sup>b</sup> (2.3–3.0) | 2.7 <sup>b</sup> (2.3–3.0) | 2.8 <sup>b</sup> (2.4–3.0) | 2.8 <sup>b</sup> (2.5–3.1) |
| %                          | 100 (97–104)       | +6 <sup>b</sup> (2–10)     | +9 <sup>b</sup> (5–13)     | +13 <sup>b</sup> (8–18)    | +14 <sup>b</sup> (6–22)    |
| Medial, g/cm <sup>2</sup>  | 2.3 (2.0–2.7)      | 2.4 (2.1–2.8)              | 2.4 <sup>b</sup> (2.1–2.7) | 2.5 <sup>b</sup> (2.2–2.8) | 2.5 <sup>b</sup> (2.1–2.9) |
| %                          | 101 (97–106)       | +6 <sup>b</sup> (1–11)     | +6 <sup>b</sup> (0–11)     | +9 <sup>b</sup> (3–16)     | 10 <sup>b</sup> (1–18)     |
| Caudal, g/cm <sup>2</sup>  | 2.3 (2.0–2.6)      | 2.3 (2.0–2.7)              | 2.3 (1.9–2.7)              | 2.3 (1.9–2.7)              | 2.4 (2.0–2.7)              |
| %                          | 101 (97–106)       | +3 (–3–8)                  | +3 (–3–9)                  | +4 (–3–11)                 | +4 (–6–16)                 |
| Total, g/cm <sup>2</sup>   | 2.4 (2.1–2.6)      | 2.4 <sup>b</sup> (2.2–2.7) | 2.5 <sup>b</sup> (2.2–2.8) | 2.5 <sup>b</sup> (2.3–2.9) | 2.6 <sup>b</sup> (2.2–2.9) |
| %                          | 101 (98–104)       | +4 <sup>b</sup> (1–8)      | +6 <sup>b</sup> (2–10)     | +8 <sup>b</sup> (4–13)     | +9 <sup>b</sup> (2–15)     |

<sup>a</sup> BMD changes were tested for significant difference compared with the postoperative value in a linear mixed model.

<sup>b</sup> Statistically significant different BMD value compared with the baseline value.

Table 3. Point estimates of clinical scores over time with 95% confidence interval <sup>a</sup>

| Type             | Preoperative<br>n = 20 | 3 months<br>n = 20      | 6 months<br>n = 20      | 1 year<br>n = 20        | 2 years<br>n = 19       |
|------------------|------------------------|-------------------------|-------------------------|-------------------------|-------------------------|
| Oxford Hip Score | 39 (35–43)             | 31 <sup>b</sup> (27–35) | 27 <sup>b</sup> (23–32) | 26 <sup>b</sup> (21–31) | 25 <sup>b</sup> (17–34) |
| SF 12-physical   | 46 (34–58)             | 40 (28–51)              | 51 (40–64)              | 50 (37–63)              | 50 (34–67)              |
| SF12-mental      | 50 (38–58)             | 49 (40–61)              | 61 <sup>b</sup> (49–72) | 58 <sup>b</sup> (46–70) | 63 <sup>b</sup> (49–78) |
| VAS-pain         | 60 (46–71)             | 35 <sup>b</sup> (25–48) | 29 <sup>b</sup> (19–40) | 29 <sup>b</sup> (17–42) | 31 <sup>b</sup> (19–48) |
| VAS-satisfaction | –                      | 71 (59–82)              | 78 (65–89)              | 77 (65–88)              | 77 (63–90)              |

<sup>a</sup> Results were tested for significant difference compared with the postoperative value in a linear mixed model. Oxford Hip Score (OHS), SF12-score, and a visual analogue scale (VAS) for pain and satisfaction: “0” is minimum score and “100” is maximum score.

<sup>b</sup> Statistically significant different BMD value compared with the baseline value.

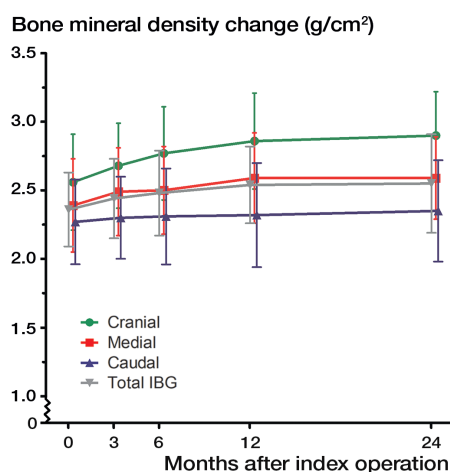

Figure 4. Point estimates of mean bone mineral density (BMD) changes of the impacted bone graft (g/cm<sup>2</sup>) with 95% confidence intervals during 2 years' follow-up. The mean total BMD (grey) is divided into 3 regions of interest: cranial (green), medial (red), and caudal (blue) to the acetabular cup.
